# Supplementary material for: Statistical Modelling of Biosorptive Removal of Hexavalent Chromium Using Dry Raw Biomasses of Dioscorea rotundata, Elaeis guineensis, Manihot esculenta, Theobroma cacao and Zea mays
Source: MDPI journal article supplement (doi:10.3390/su15129156), 2023-06-06
Supplement: s1 [file s1]

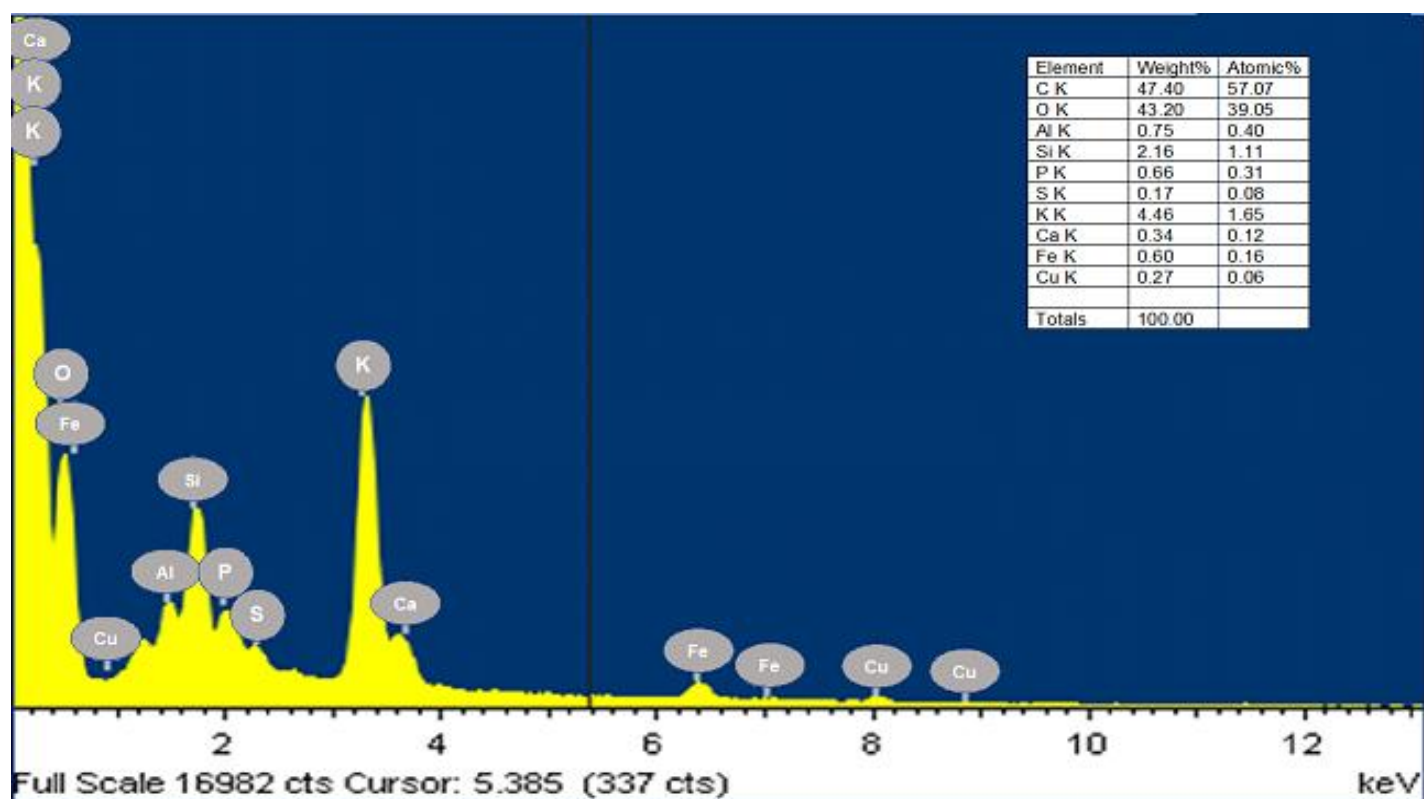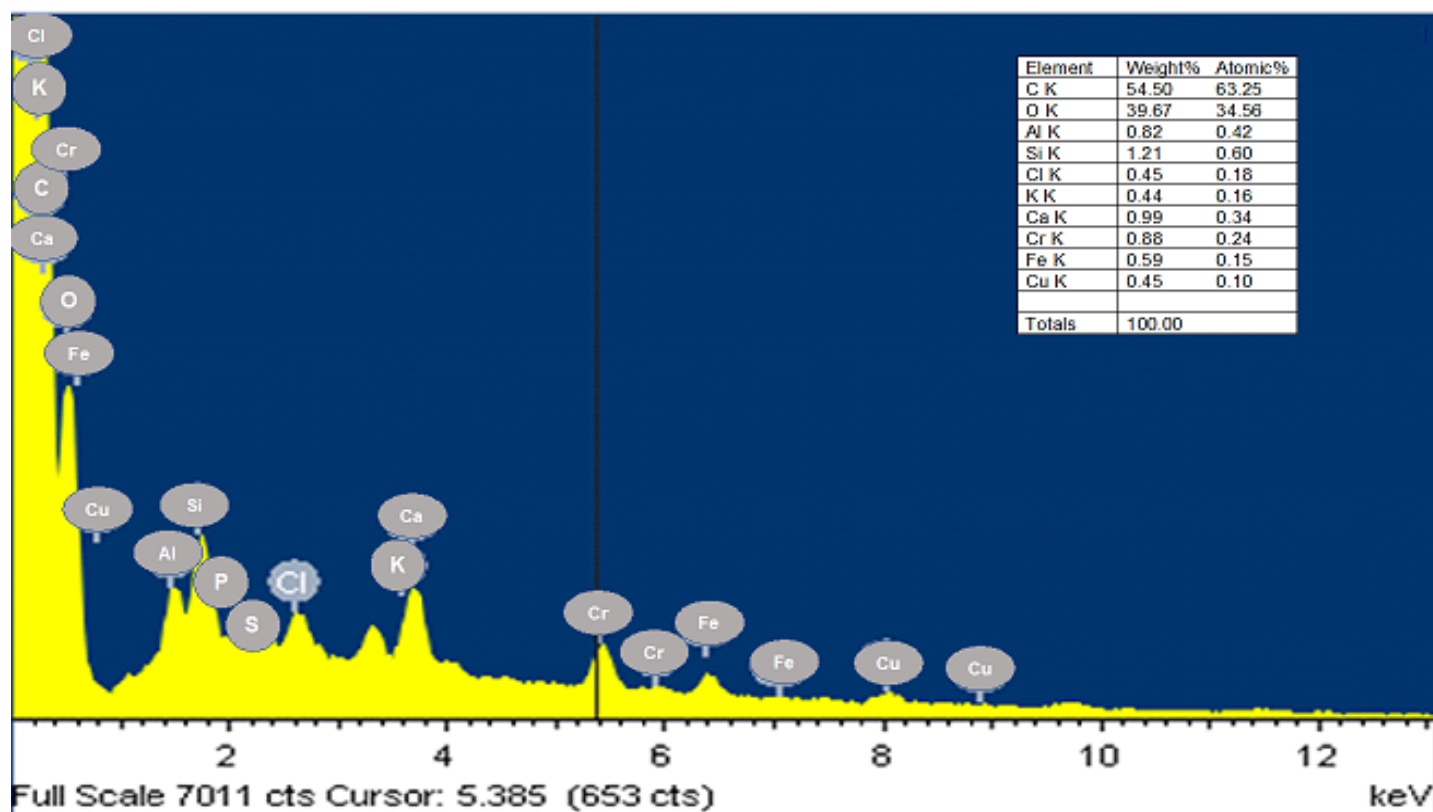

Figure S1: EDS spectra of YP: upper) before and lower) after Cr (VI) adsorption

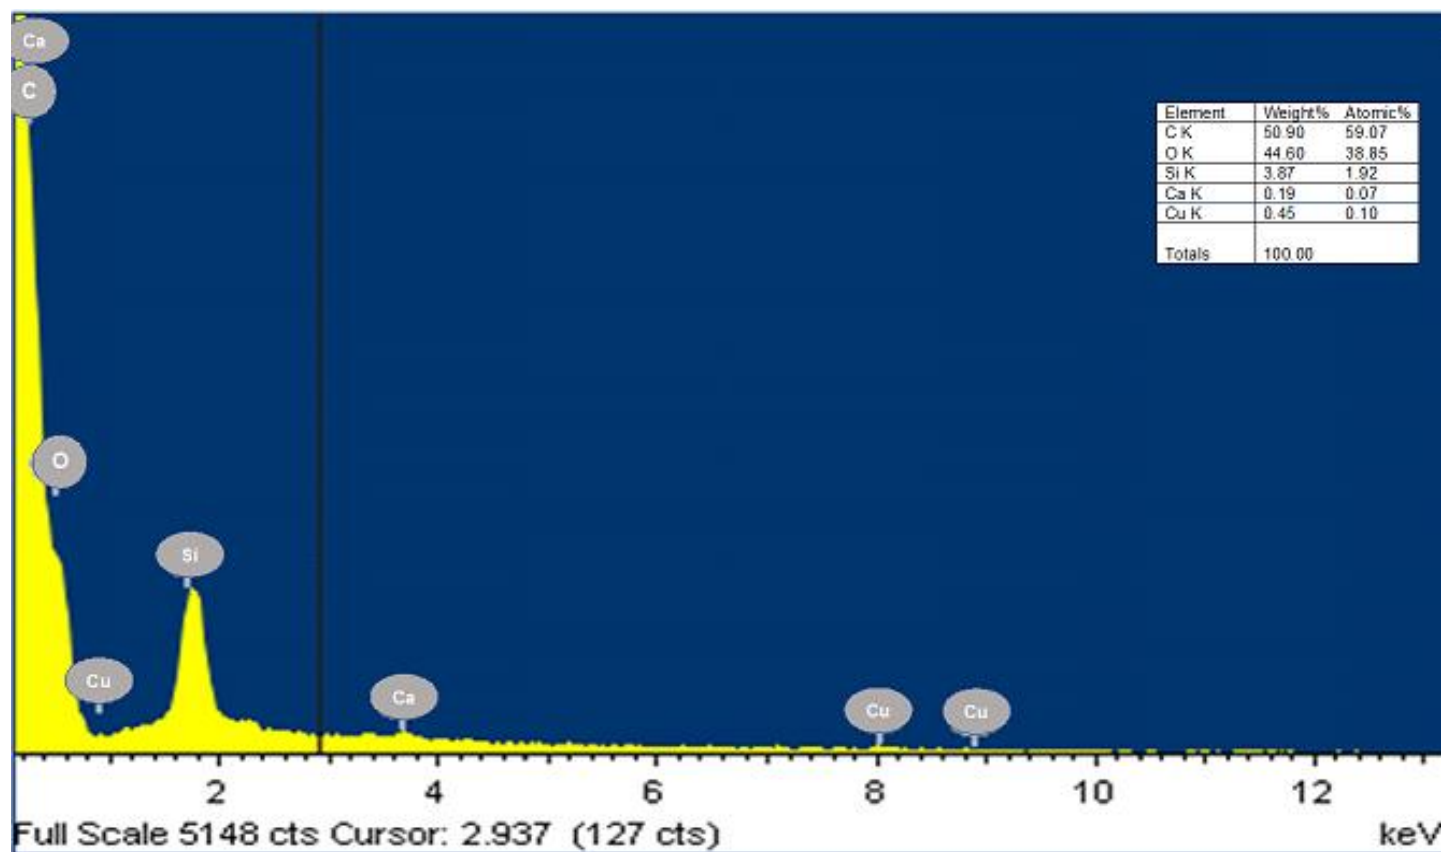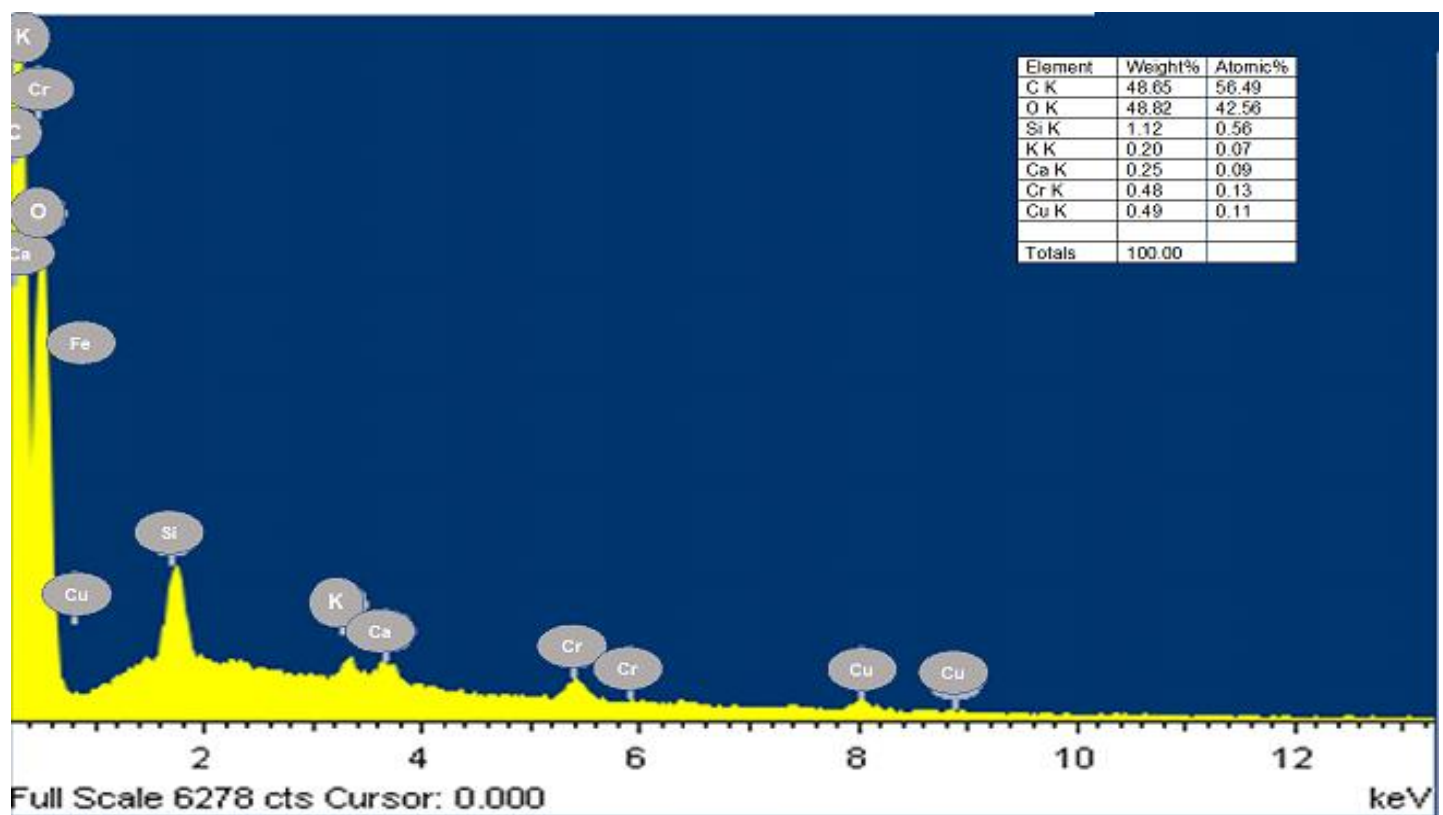

Figure S2: EDS spectra of PF: upper) before and lower) after Cr (VI) adsorption

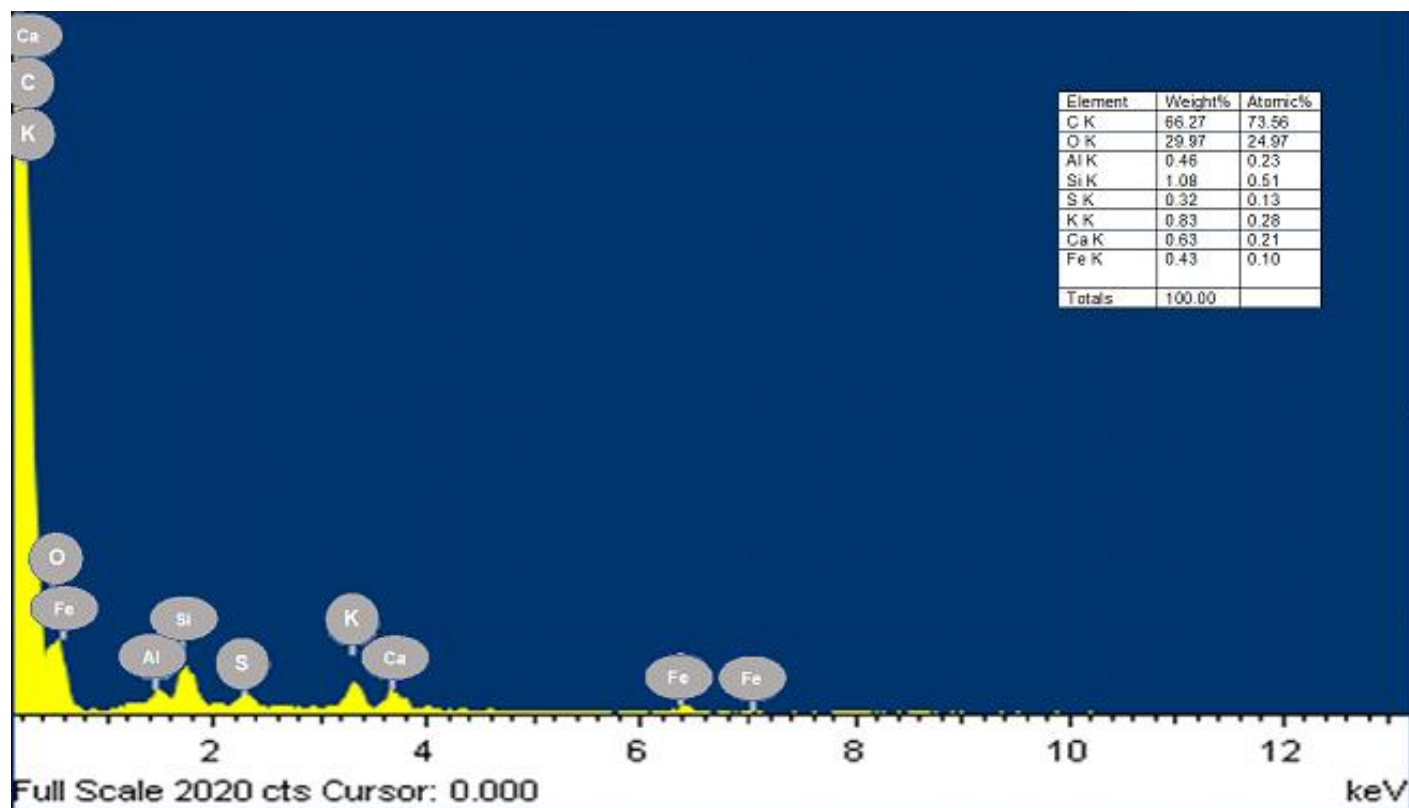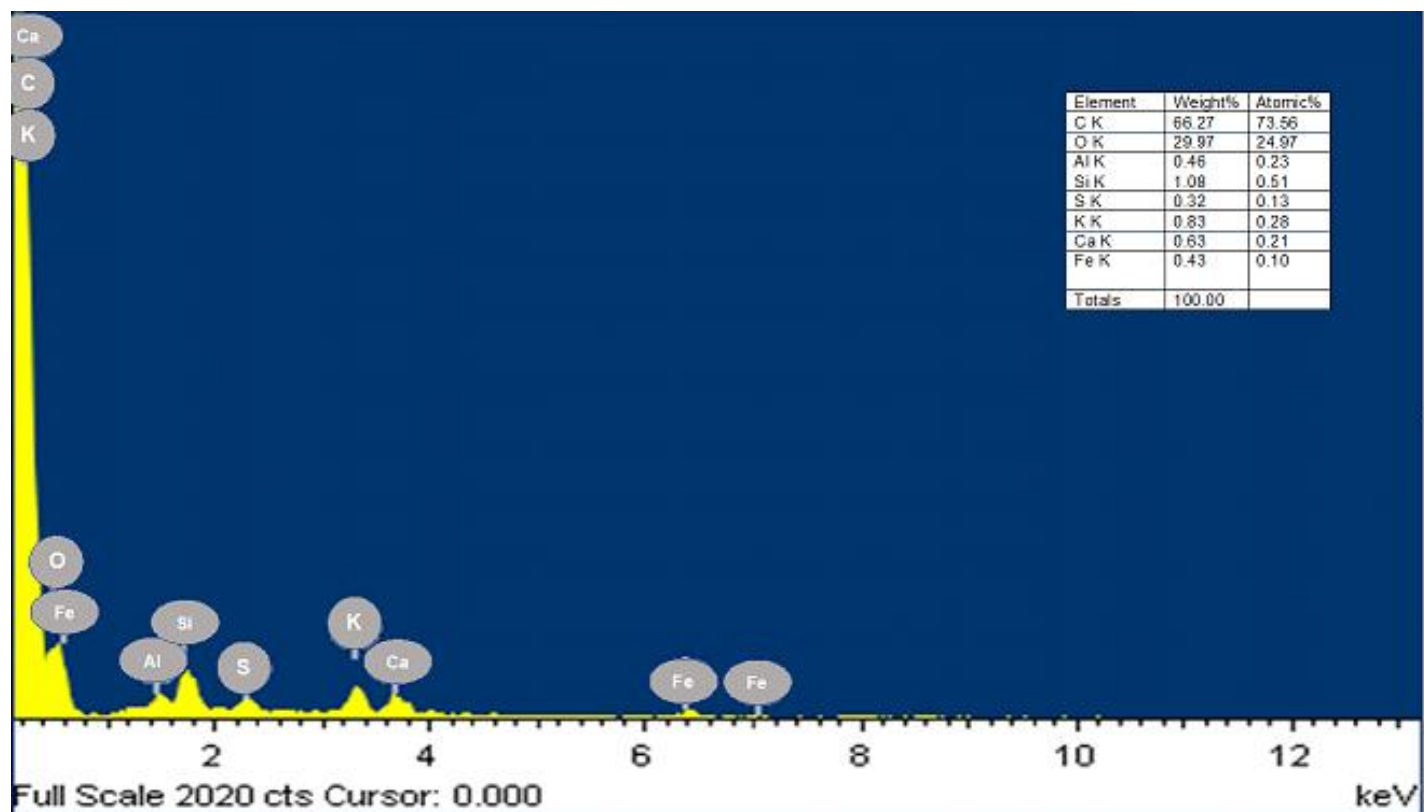

Figure S3: EDS spectra of CP: upper) before and lower) after Cr (VI) adsorption

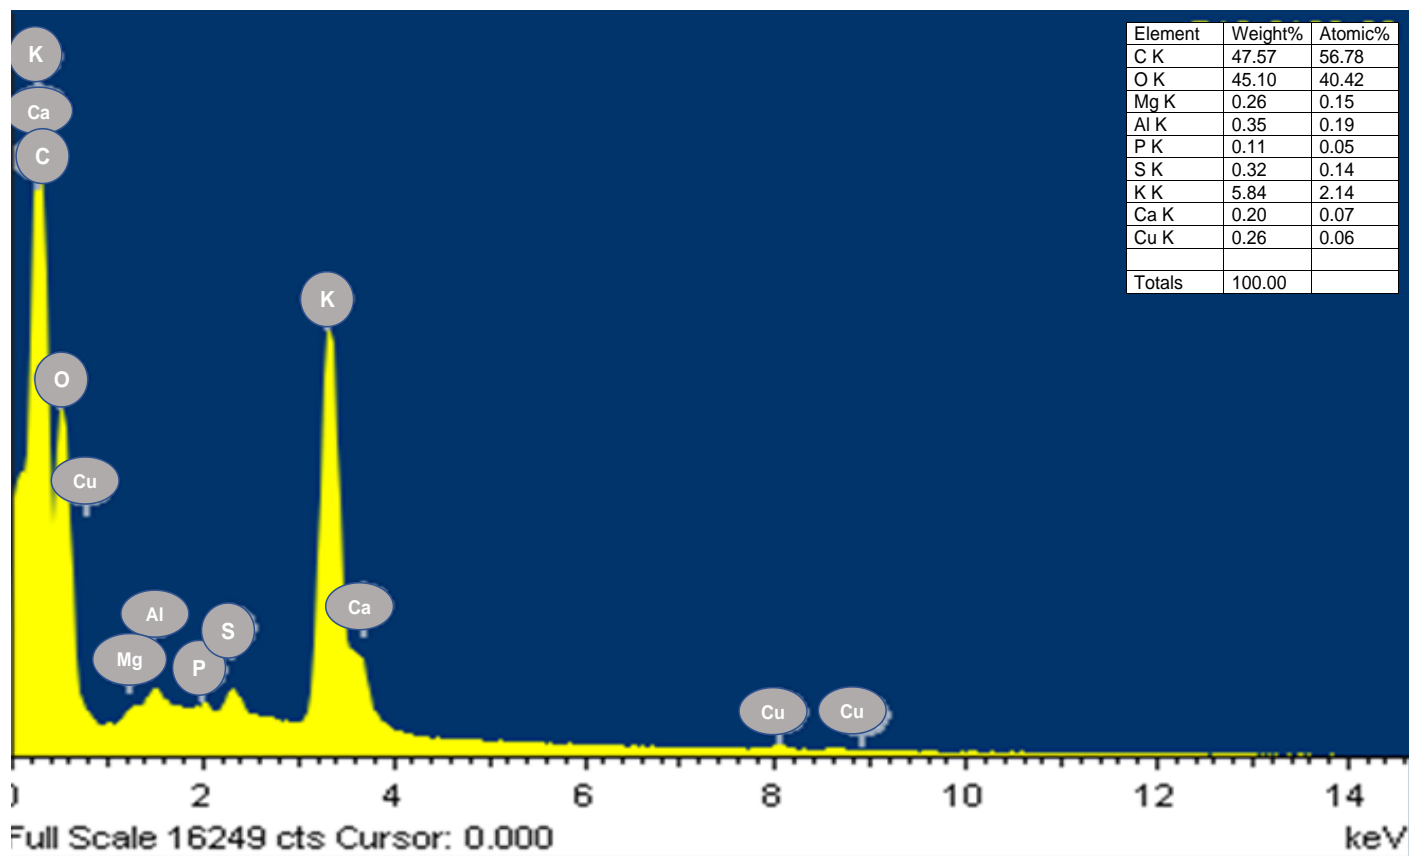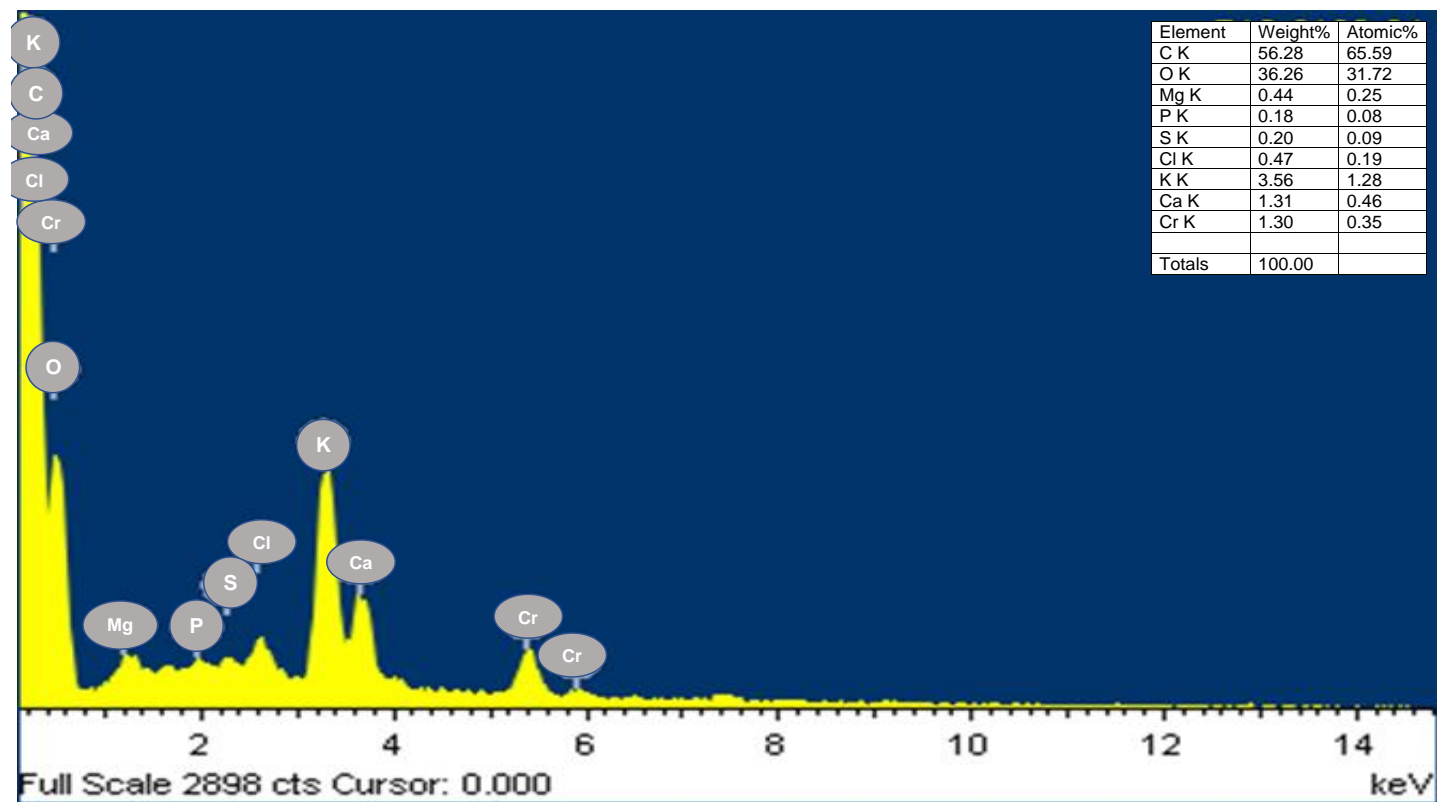

Figure S4: EDS spectra of CH: upper) before and lower) after Cr (VI) adsorption

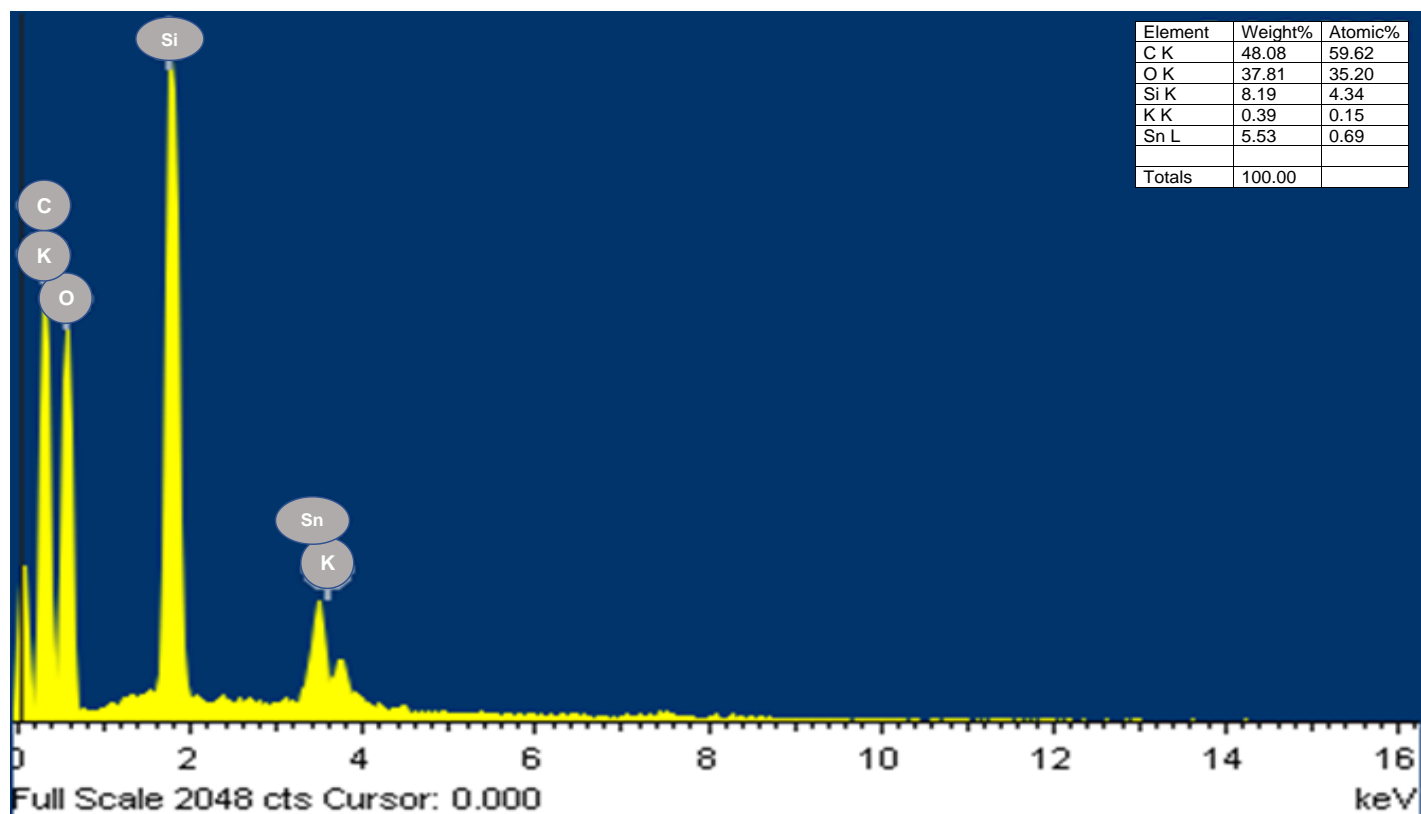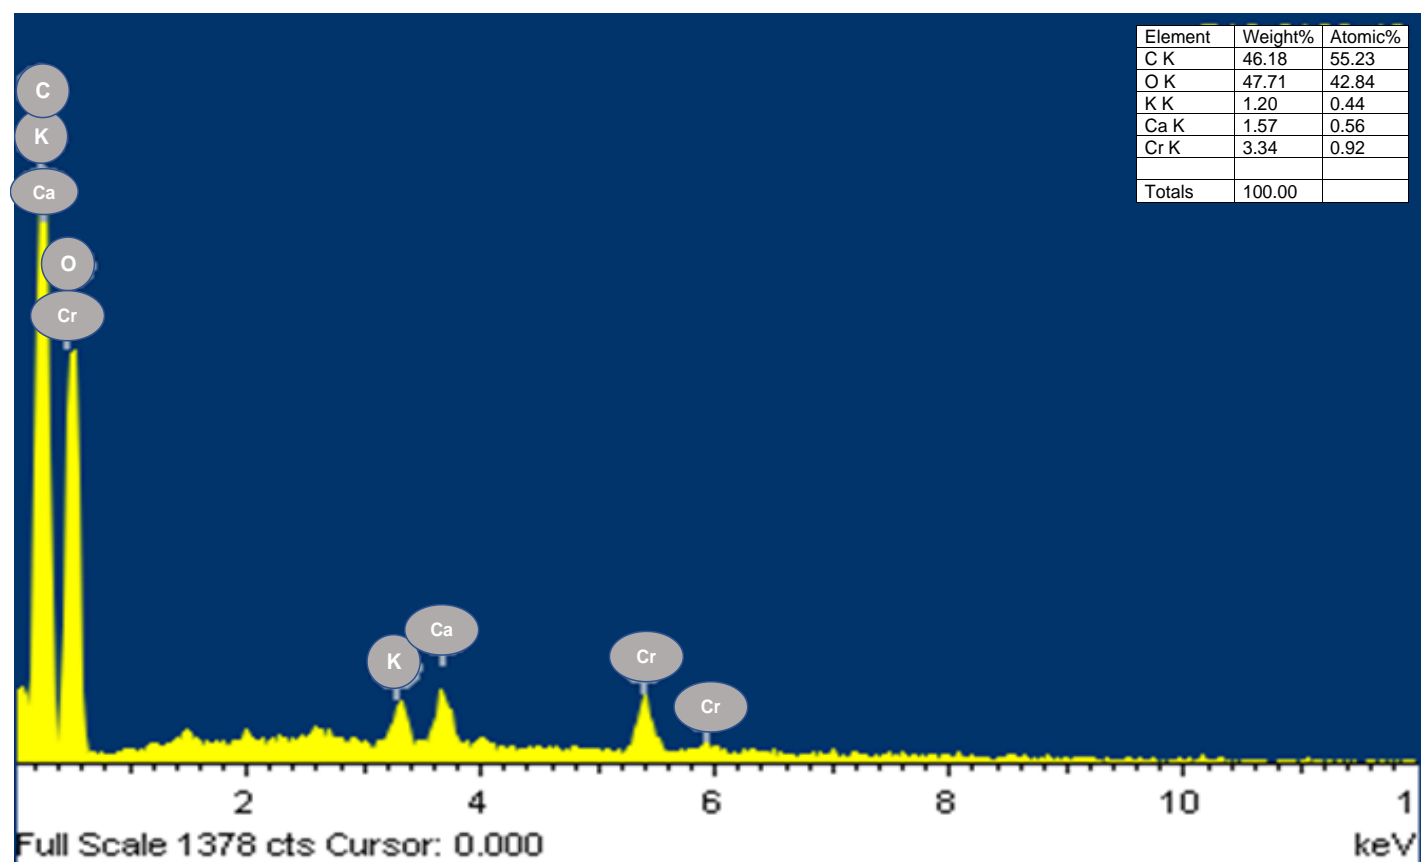

Figure S5: EDS spectra of CR: upper) before and lower) after Cr (VI) adsorption

**Table S1:** Model fitting and regression analysis of Cr (VI) adsorption process onto PF

| Source            | Sum of squares | DF | Mean Square | F-Value | P-Value |
|-------------------|----------------|----|-------------|---------|---------|
| A: Temperature    | 0:875585       | 1  | 0:875585    | 0:01    | 0:9435  |
| B: Particle size  | 0:875662       | 1  | 0:875662    | 0:01    | 0:9435  |
| C: Adsorbent dose | 580:248        | 1  | 580:248     | 3:62    | 0:1056  |
| AA                | 113:504        | 1  | 113:504     | 0:71    | 0:4321  |
| AB                | 1:49472        | 1  | 1:49472     | 0:01    | 0:9262  |
| AC                | 1:49472        | 1  | 1:49472     | 0:01    | 0:9262  |
| BB                | 113:503        | 1  | 113:503     | 0:71    | 0:4321  |
| BC                | 1:49472        | 1  | 1:49472     | 0:01    | 0:9262  |
| CC                | 324:129        | 1  | 324:129     | 2:02    | 0:2046  |
| Total error       | 960:639        | 6  | 160:106     |         |         |
| Total (corr:)     | 2,494:67       | 15 |             |         |         |

**Table S2:** Model fitting and regression analysis of Cr (VI) adsorption process onto YP

| Source               | Sum of squares | DF | Mean Square | F-Value | P-Value |
|----------------------|----------------|----|-------------|---------|---------|
| A: Temperature       | 33:4775        | 1  | 33:4775     | 0:03    | 0:8785  |
| B: Particle size     | 116:04         | 1  | 116:04      | 0:09    | 0:7766  |
| C: Adsorbent dose    | 375:525        | 1  | 375:525     | 0:29    | 0:6125  |
| AA                   | 217:059        | 1  | 217:059     | 0:16    | 0:6988  |
| AB                   | 2333:98        | 1  | 2333:98     | 1:77    | 0:2314  |
| AC                   | 829:864        | 1  | 829:864     | 0:63    | 0:4575  |
| BB                   | 2146:49        | 1  | 2146:49     | 1:63    | 0:2488  |
| BC                   | 1:94085        | 1  | 1:94085     | 0:00    | 0:9706  |
| CC                   | 108:599        | 1  | 108:599     | 0:08    | 0:7836  |
| Total error          | 7898:78        | 6  | 1316:46     |         |         |
| <b>Total (corr:)</b> | 1,3842:2       | 15 |             |         |         |

**Table S3:** Model fitting and regression analysis of Cr (VI) adsorption process onto CP

| Source            | Sum of squares | DF | Mean Square | F-Value | P-Value |
|-------------------|----------------|----|-------------|---------|---------|
| A: Temperature    | 222:844        | 1  | 222:844     | 0:35    | 0:5737  |
| B: Particle size  | 63:7895        | 1  | 63:7895     | 0:10    | 0:7611  |
| C: Adsorbent dose | 1060:17        | 1  | 1060:17     | 1:68    | 0:2421  |
| AA                | 55:8911        | 1  | 55:8911     | 0:09    | 0:7758  |
| AB                | 339:992        | 1  | 339:992     | 0:54    | 0:4902  |
| AC                | 191:444        | 1  | 191:444     | 0:30    | 0:6013  |
| BB                | 1185:89        | 1  | 1185:89     | 1:88    | 0:2191  |
| BC                | 182:912        | 1  | 182:912     | 0:29    | 0:6093  |
| CC                | 25:3611        | 1  | 25:3611     | 0:04    | 0:8476  |
| Total error       | 3778:9         | 6  | 629:817     |         |         |

|               |          |    |
|---------------|----------|----|
| Total (corr:) | 7,158:46 | 15 |
|---------------|----------|----|

**Table S4:** Model fitting and regression analysis of Cr (VI) adsorption process onto CH

| Source            | Sum of squares | DF | Mean Square | F-Value | P-Value |
|-------------------|----------------|----|-------------|---------|---------|
| A: Temperature    | 110:006        | 1  | 110:006     | 0:73    | 0:4260  |
| B: Particle size  | 0:00105581     | 1  | 0:00105581  | 0:00    | 0:9980  |
| C: Adsorbent dose | 1649:42        | 1  | 1649:42     | 10:93   | 0:0163  |
| AA                | 22:4025        | 1  | 22:4025     | 0:15    | 0:7133  |
| AB                | 0:00245        | 1  | 0:00245     | 0:00    | 0:9969  |
| AC                | 205:639        | 1  | 205:639     | 1:36    | 0:2873  |
| BB                | 22:4024        | 1  | 22:4024     | 0:15    | 0:7133  |
| BC                | 0:0512         | 1  | 0:0512      | 0:00    | 0:9859  |
| CC                | 913:511        | 1  | 913:511     | 6:05    | 0:0491  |
| Total error       | 905:352        | 6  | 150:892     |         |         |
| Total (corr:)     | 4,355:48       | 15 |             |         |         |

**Table S5:** Model fitting and regression analysis of Cr (VI) adsorption process onto CR

| Source            | Sum of squares | DF | Mean Square | F-Value | P-Value |
|-------------------|----------------|----|-------------|---------|---------|
| A: Temperature    | 75:314         | 1  | 75:314      | 0:56    | 0:4818  |
| B: Particle size  | 0:174279       | 1  | 0:174279    | 0:00    | 0:9724  |
| C: Adsorbent dose | 1225:97        | 1  | 1225:97     | 9:15    | 0:0233  |
| AA                | 14:5439        | 1  | 14:5439     | 0:11    | 0:7530  |
| AB                | 0:0529751      | 1  | 0:0529751   | 0:00    | 0:9848  |
| AC                | 152:382        | 1  | 152:382     | 1:14    | 0:3273  |
| BB                | 19:6414        | 1  | 19:6414     | 0:15    | 0:7150  |
| BC                | 1:74939        | 1  | 1:74939     | 0:01    | 0:9128  |
| CC                | 781:65         | 1  | 781:65      | 5:83    | 0:0522  |
| Total error       | 803:977        | 6  | 133:996     |         |         |
| Total (corr:)     | 3,515:25       | 15 |             |         |         |
